# Supplementary material for: Phenotypical antimicrobial resistance data of clinical and non-clinical Escherichia coli from poultry in Germany between 2014 and 2017
Source: PLoS One. 2020 Dec 11;15(12):e0243772. doi: 10.1371/journal.pone.0243772 (PMC7732064; doi:10.1371/journal.pone.0243772)
Supplement: S1 Data — (XLSX) [file pone.0243772.s001.xlsx]

## Sheet: default
row ID
